# Supplementary material
Source: PubMed Central journal article supplement (PMC2886287)
Supplement: NIHMS202530-supplement-1_si_001.pdf [file NIHMS202530-supplement-1_si_001.pdf]

## Supporting Information

### Mononuclear Copper Complex Catalyzed Four-Electron Reduction of Oxygen

Shunichi Fukuzumi,<sup>†,‡\*</sup> Hiroaki Kotani,<sup>†</sup> Heather R. Lucas,<sup>§</sup> Kaoru Doi,<sup>†</sup>  
Tomoyoshi Suenobu,<sup>†</sup> Ryan L. Peterson,<sup>§,‡</sup> and Kenneth D. Karlin<sup>§,‡\*</sup>

<sup>†</sup>*Department of Material and Life Science, Graduate School of Engineering, Osaka University, SORST, Japan Science and Technology Agency (JST), Suita, Osaka 565-0871, Japan*

<sup>‡</sup>*Department of Chemistry, Division of Nano Sciences, Center for Biomimetic Systems, Ewha Womans University, Seoul 120-750, Korea*

<sup>§</sup>*Department of Chemistry, Johns Hopkins University, Baltimore, Maryland 21218, USA*

\* To whom correspondence should be addressed.

E-mail: fukuzumi@chem.eng.osaka-u.ac.jp, karlin@jhu.edu

## Experimental Section

**Materials.** Commercially available reagents, decamethylferrocene ( $\text{Fc}^*$ ), perchloric acid (70%), trifluoroacetic acid, hydrogen peroxide (30%), and NaI (Wako Pure Chemical Industries.) were the best available purity and used without further purification unless otherwise noted. Acetone was dried according to the literature procedures<sup>1</sup> and distilled under Ar prior to use. Copper complex  $[(\text{tmpa})\text{Cu}^{\text{II}}](\text{ClO}_4)_2$  (**1**) (tmpa: tris(2-pyridylmethyl)amine) was prepared according to literature procedures.<sup>1</sup>

**UV-Vis Spectral Titration.** The catalytic reduction of  $\text{O}_2$  was observed by the spectral change in the presence of various concentrations of  $\text{HClO}_4$  at 298 K using a Hewlett Packard 8453 photodiode-array spectrophotometer with a quartz cuvette (path length = 10 mm). Typically, an acetone solution of  $\text{HClO}_4$  ( $0 - 1.44 \times 10^{-3}$  M) was added by means of a microsyringe to an  $\text{O}_2$ -saturated acetone solution containing **1** ( $9.0 \times 10^{-5}$  M) and  $\text{Fc}^*$  ( $1.5 \times 10^{-3}$  M). The concentration of  $\text{Fc}^{*+}$  was determined from the absorption band at  $\lambda_{\text{max}} = 780$  nm ( $\epsilon = 4.5 \times 10^2 \text{ M}^{-1} \text{ cm}^{-1}$ ). The  $\epsilon$  value of  $\text{Fc}^{*+}$  was confirmed by the electron-transfer oxidation of  $\text{Fc}^*$  with  $[\text{Ru}^{\text{III}}(\text{bpy})_3](\text{PF}_6)_3$ .

The limiting concentration of  $\text{O}_2$  in an acetone solution was prepared by a mixed gas flow of  $\text{O}_2$  and  $\text{N}_2$ . The mixed gas was controlled by using a gas mixer (Kofloc GB-3C, KOJIMA Instrument Inc.), which can mix two or more gases at a certain pressure and flow rate.

**Reaction Procedure.** Gas chromatographic analysis was performed on a Shimadzu GC-17A equipped with an InertCap 5MS/Sil column (GL Science Inc., 30 m) and a mass spectrograph (Shimadzu QP-5000) as a detector. The amount of  $\text{H}_2\text{O}_2$  was determined by the titration by iodide ion. The diluted acetone solution ( $\times 10$ ) of the reduced product of  $\text{O}_2$  was treated with an excess amount of NaI. The amount of  $\text{I}_3^-$  formed was then determined by the visible spectrum ( $\lambda_{\text{max}} = 361$  nm,  $\epsilon = 2.5 \times 10^4 \text{ M}^{-1} \text{ cm}^{-1}$ ).

**Kinetic Measurements.** Kinetic measurements were performed on a UNISOKU RSP-601 stopped-flow spectrometer equipped with a MOS-type highly sensitive photodiode

array or a Hewlett Packard 8453 photodiode-array spectrophotometer at 298 K. Rates of electron transfer from  $\text{Fc}^*$  to **1** were monitored by the rise of absorption bands due to  $\text{Fc}^{*+}$  and  $[(\text{tmpa})\text{Cu}^{\text{II}}(\text{O}_2)\text{Cu}^{\text{II}}(\text{tmpa})]^{2+}$  (**2**). All kinetic measurements were carried out under pseudo-first-order conditions where concentrations of  $\text{Fc}^*$  was maintained to be more than in 10-fold excess compared to the concentration of **1**.

## References

- (1) Tyeklár, Z.; Jacobson, R. R.; Wei, N.; Murthy, N. N.; Zubieta, J.; Karlin, K. D. *J. Am. Chem. Soc.* **1993**, *115*, 2677.
- (2) Armarego, W. L. F.; Chai, C. L. L. *Purification of Laboratory Chemicals*, 5th ed.; Butterworth-Heinemann: Amsterdam, 2003.

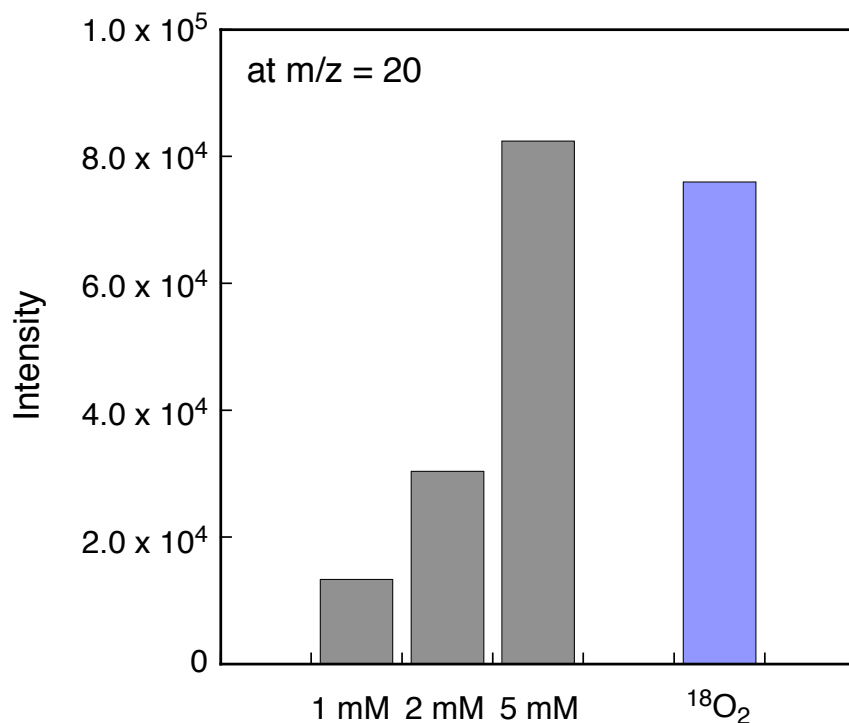

**Figure S1.** A molecular ion peak at  $m/z = 20$  due to  $\text{H}_2^{18}\text{O}$  (gray: 1, 2 and 5 mM) and that observed in the reduction of  $^{18}\text{O}_2$  (blue) with  $\text{Fc}^*$  (17 mM) catalyzed by **1** (0.1 mM) in the presence of  $\text{CF}_3\text{COOH}$  (20 mM) in acetone at 298 K after 3h.

**Comment:** The product of catalytic  $\text{O}_2$  reduction was confirmed to be  $\text{H}_2\text{O}$  by using  $^{18}\text{O}$ -labeled  $\text{O}_2$ , because  $\text{H}_2^{18}\text{O}$  was formed by the reduction of  $^{18}\text{O}_2$ . Trifluoroacetic acid ( $\text{CF}_3\text{COOH}$ ) was used as a proton source instead of  $\text{HClO}_4$  to avoid inclusion of  $\text{H}_2\text{O}$ .

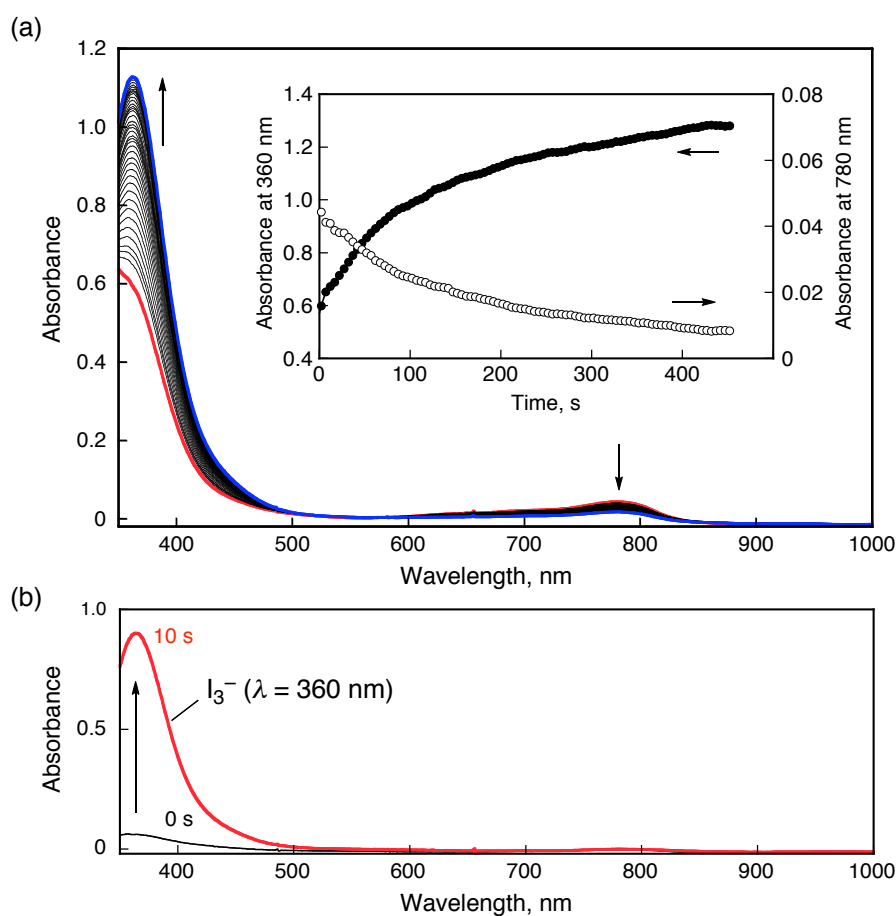

**Figure S2** (a) Spectral changes in the reaction of NaI (0.3 M) and reduced product of  $O_2$  (2.2 mM) in acetone solution including  $Fe^{*+}$  (0.15 mM), **1** ( $9.0 \times 10^{-6}$  M) and  $HClO_4$  (0.15 mM). Inset: Time profiles of formation of  $I_3^-$  monitored by absorbance at 360 nm and decay of  $Fe^{*+}$  at 780 nm. (b) Spectral changes in the reaction of NaI (0.3 M) and  $H_2O_2$  (0.15 mM) in acetone solution.

**Comment:** The formation of  $I_3^-$  was accompanied by the decay of  $Fe^{*+}$ , see Figure S2a. This indicates that there is no formation of  $H_2O_2$  in this solution compared to the reaction between NaI and  $H_2O_2$ , see Figure S1b.

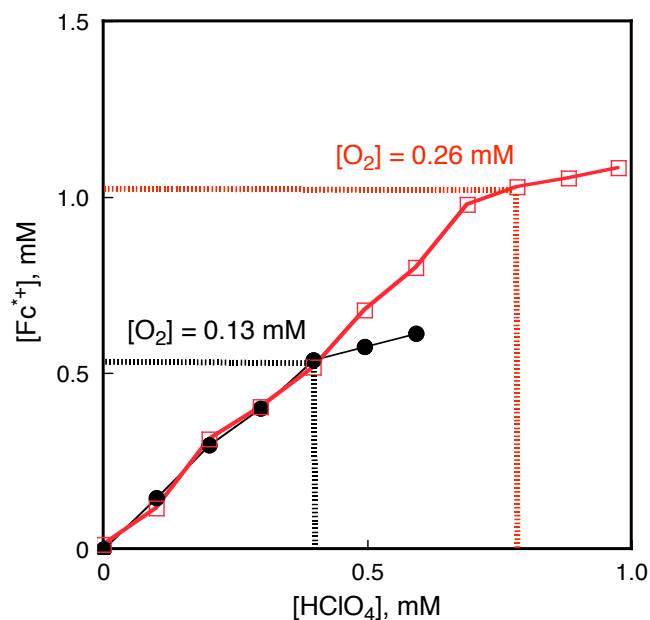

**Figure S3.** The concentration of  $\text{Fc}^{*+}$  determined from absorbance at 780 nm vs the concentration of  $\text{HClO}_4$  in the reduction of  $\text{O}_2$  [0.13 mM (●) and 0.26 mM (□)] with  $\text{Fc}^*$  (2.0 mM) catalyzed by **1** (0.04 mM) in the presence of  $\text{HClO}_4$  in acetone at 298 K.

**Comment:** The stoichiometry of  $\text{O}_2$  as described in eq 1 was confirmed by using a limiting  $[\text{O}_2]$  experiment. After the addition of four equiv. of  $\text{HClO}_4$ , four equiv. of  $\text{Fc}^{*+}$  was formed with respect to the initial concentration of  $\text{O}_2$ .

The turnover number ( $\text{TON} = 7$ ) was determined from the ratio (moles of  $\text{Fc}^{*+}$ :  $43 \mu\text{mol}$ )/(moles of **1**:  $1.5 \mu\text{mol}$ ) in the catalytic reduction of  $\text{O}_2$  (2.2 mM) by  $\text{Fc}^*$  (10 mM) in the presence of **1** (0.3 mM) and  $\text{HClO}_4$  (10 mM) in acetone (5 mL) at 298 K. In this case, a stoichiometric amount of  $\text{HClO}_4$  was added at the beginning.

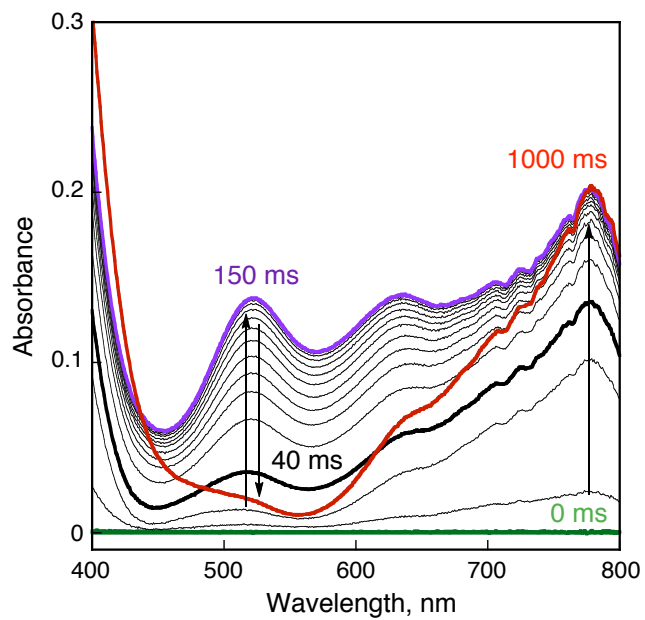

**Figure S4.** UV-vis spectral change observed in electron transfer from  $\text{Fc}^*$  (1.0 mM) to **1** (0.12 mM) in the presence of  $\text{HClO}_4$  (0.35 mM) in aerated acetone at 298 K.

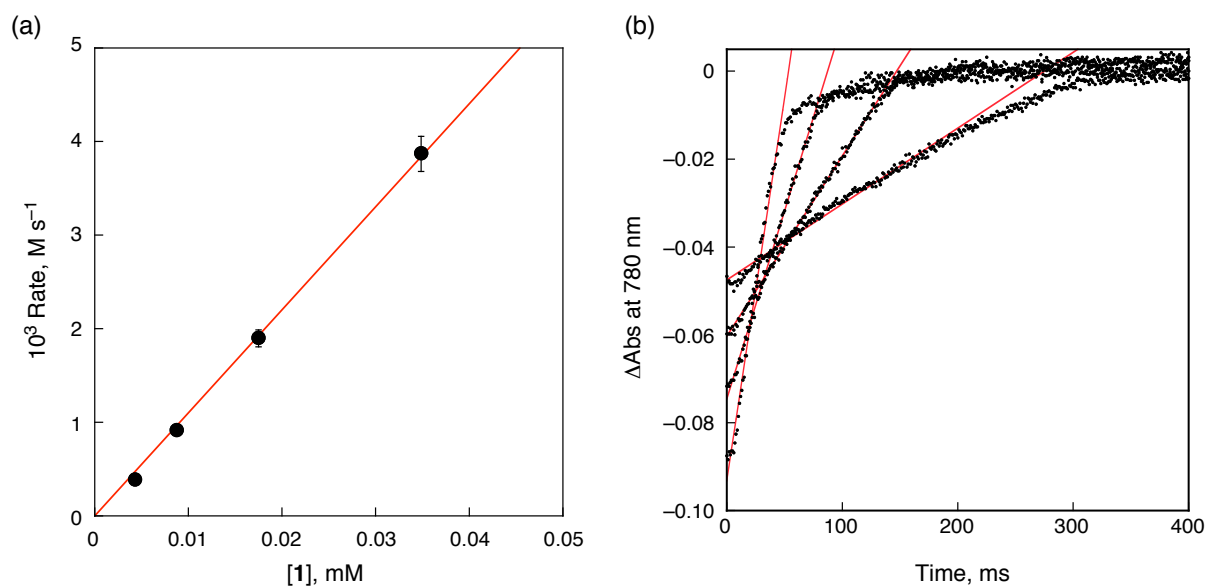

**Figure S5.** (a) Plot of the constant rate vs **[1]** ( $0.5 - 3.5 \times 10^{-5}$  M) in an acetone solution containing  $\text{Fc}^*$  (1.0 mM),  $\text{O}_2$  (2.2 mM), and  $\text{HClO}_4$  (0.1 mM) at 298 K. (b) Time profiles of the absorbance at 780 nm due to  $\text{Fc}^{*+}$ .

**Comment:** The constant rate also increased linearly with  $[\text{Fc}^*]$  (data is not shown) under the conditions ( $[\text{Fc}^*], [\text{O}_2] \gg [\text{H}^+] > [\mathbf{1}]$ ).



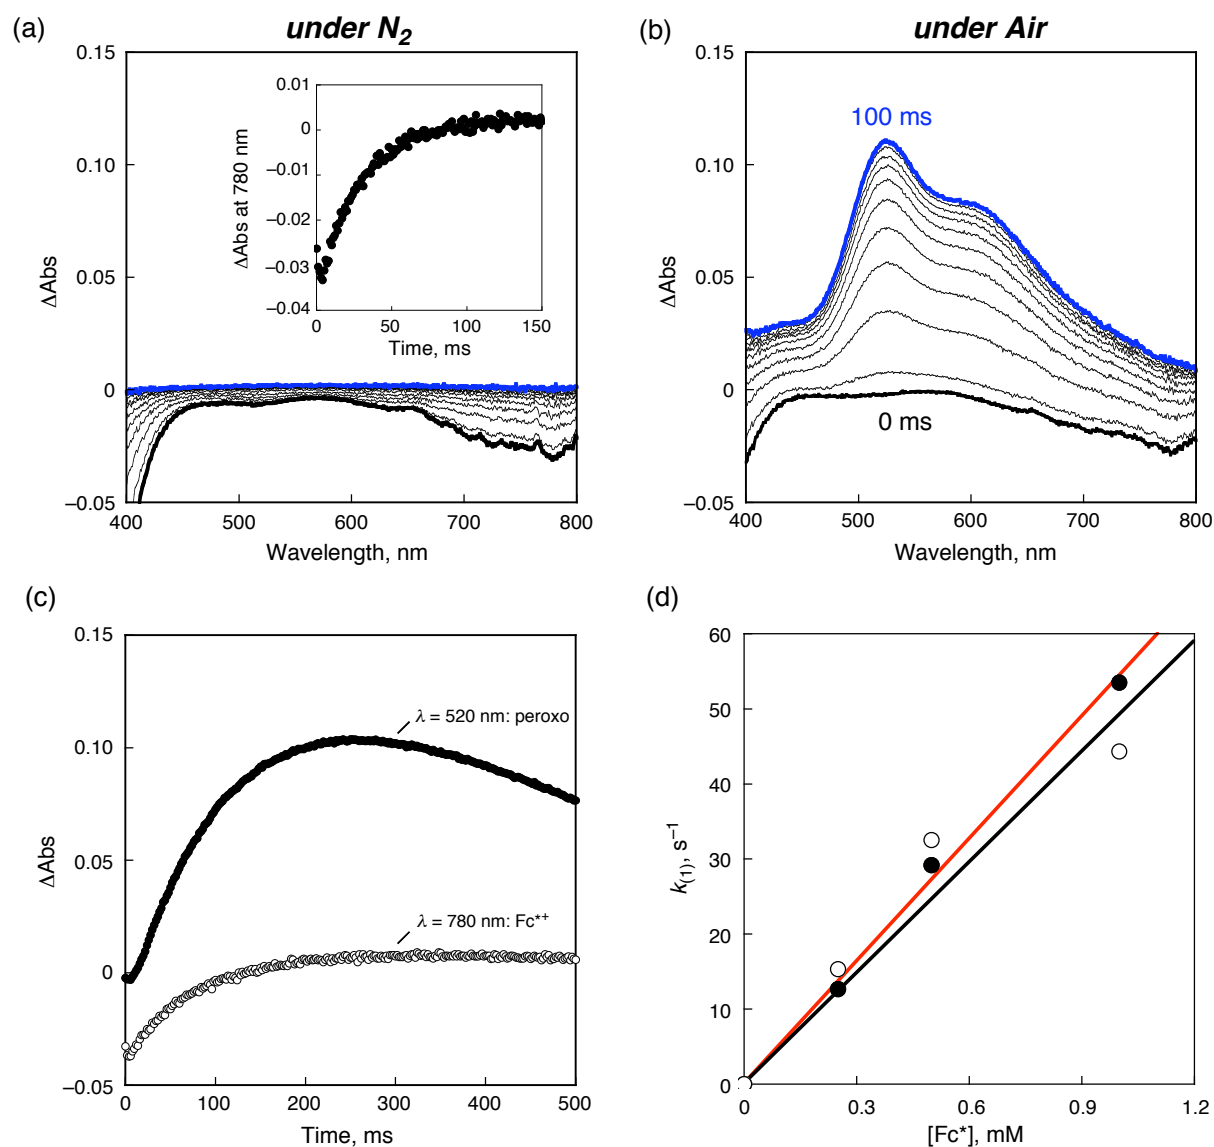

**Figure S6.** UV-vis spectral change observed in electron transfer from  $\text{Fc}^*$  (1.0 mM) to **1** (0.05 mM) in (a) deaerated or (b) air saturated acetone solution. Inset: Time profile of absorbance at 780 nm due to  $\text{Fc}^{*+}$ . (c) Time profiles of formation of **2** and  $\text{Fc}^{*+}$  monitored by the absorbances at 520 nm and 780 nm in electron transfer from  $\text{Fc}^*$  (0.5 mM) to **1** (0.05 mM) in aerated acetone at 298 K. (d) Plots of  $k_{(1)}$  vs  $[\text{Fc}^*]$  under  $\text{N}_2$  (O) and air (●).

**Comment:** The second-order rate constant ( $k'_{\text{obs}}$ ) for formation of  $\text{Fc}^{*+}$  in the presence of  $\text{O}_2$  is virtually the same value as compared to that in the absence of  $\text{O}_2$ . This indicates that a rate-determining step for formation of **2** was the electron-transfer reaction from  $\text{Fc}^*$  to **1**.

## Kinetic Analysis

Assuming that electron transfer from  $\text{Fc}^*$  to **1** with  $\text{O}_2$  is the rate-determining step in the catalytic cycle, the rate of formation of  $\text{Fc}^{*+}$  under catalytic conditions in Figure 2b is given by eq 1, where the observed second-order rate constant  $k_{\text{obs}}$  corresponds to  $2k_{\text{et}}$  ( $k_{\text{et}}$  is the rate constant of electron transfer from  $\text{Fc}^*$  to **1**), because four equiv. of  $\text{Fc}^{*+}$  are formed once electron transfer from  $\text{Fc}^*$  to **1** occurs. Equation 1 can be replaced by eq 2, where  $[\text{Fc}^*]_0$  is the initial concentration of  $\text{Fc}^*$ . Because the concentration of  $\text{Fc}^*$ ,  $[\text{Fc}^*]$ , is larger than the concentration of  $\text{HClO}_4$ , the final concentration of  $\text{Fc}^{*+}$  ( $[\text{Fc}^{*+}]_\infty$ ) is given by  $[\text{Fc}^{*+}]_\infty = [\text{HClO}_4]_0$ . Equation 3 is derived by integration of eq 2. The slope of the linear plot of  $\ln\{[\text{Fc}^*]_0 - [\text{Fc}^{*+}]\}$  vs  $t$  affords  $k_{\text{obs}}[\mathbf{1}]$ . Alternatively, the initial rate corresponds to  $k_{\text{obs}}[\text{Fc}^*][\mathbf{1}]$ :  $k_{\text{obs}}$  corresponds to  $2k_{\text{et}}$ , because two equiv. of  $\text{Fc}^{*+}$  are formed once electron transfer from  $\text{Fc}^*$  to **1** occurs according to Scheme 1.

$$d[\text{Fc}^{*+}]/dt = k_{\text{obs}}[\text{Fc}^*][\mathbf{1}] \quad (1)$$

$$d[\text{Fc}^{*+}]/dt = k_{\text{obs}}\{[\text{Fc}^*]_0 - [\text{Fc}^{*+}]\}[\mathbf{1}] \quad (2)$$

$$\ln\{[\text{Fc}^*]_0 - [\text{Fc}^{*+}]\} = \ln[\text{Fc}^*]_0 - k_{\text{obs}}[\mathbf{1}]t \quad (3)$$

The rate of formation of  $\text{Fc}^{*+}$  under single turnover conditions in Figure S4 (S5) is given by eq 4, where the observed second-order rate constant ( $k'_{\text{obs}}$ ) corresponds to  $k_{\text{et}}$ , because two equiv. of  $\text{Fc}^{*+}$  are formed once electron transfer from  $\text{Fc}^*$  to **1** occurs. Because  $[\text{Fc}^*]$  is much larger than  $[\mathbf{1}]$ , the rate obeys pseudo-first-order kinetics with respect to  $[\text{Fc}^{*+}]$ . Equation 4 is rewritten using eq 5, because  $[\mathbf{1}] = [\mathbf{1}]_0 - [\text{Fc}^{*+}]$ ;  $[\mathbf{1}]_0$  is the initial concentration of **1**.

$$d[\text{Fc}^{*+}]/dt = k'_{\text{obs}}[\text{Fc}^*][\mathbf{1}] \quad (4)$$

$$d[\text{Fc}^{*+}]/dt = k'_{\text{obs}}[\text{Fc}^*]\{[\mathbf{1}]_0 - [\text{Fc}^{*+}]\} \quad (5)$$

Equation 6 is derived by integration of eq 5.

$$\ln\{[\mathbf{1}]_0 - [\text{Fc}^{*+}]\} = \ln[\mathbf{1}]_0 - k'_{\text{obs}}[\text{Fc}^*]t \quad (6)$$

The slope of the pseudo-first-order plot affords  $k'_{\text{obs}}[\text{Fc}^*]$ .  $k_{\text{obs}} = 2k'_{\text{obs}} = 2k_{\text{et}}$ .

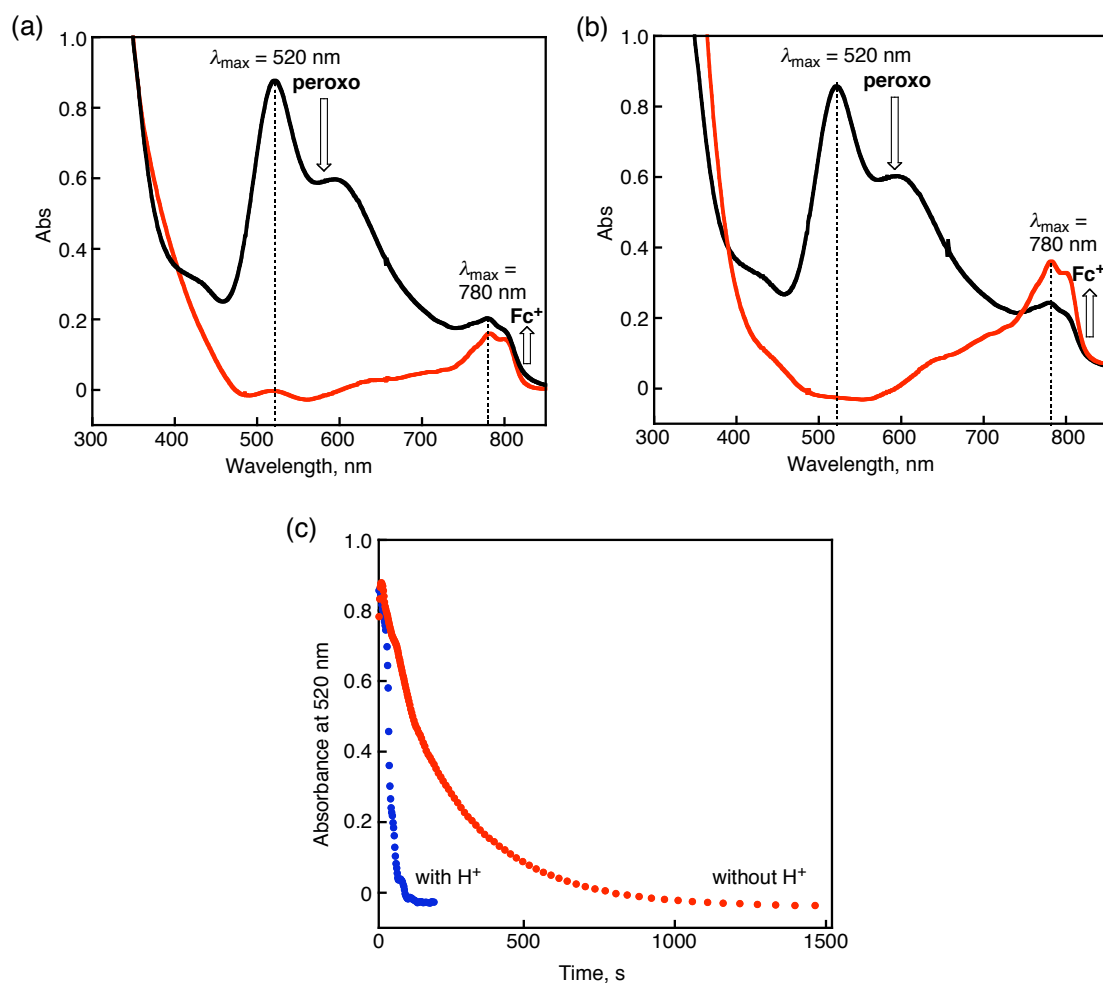

**Figure S7.** (a) UV-Vis spectrum of the peroxy species,  $[(\text{tmpa})\text{Cu}^{\text{II}}(\text{O}_2)\text{Cu}^{\text{II}}(\text{tmpa})]^{2+}$  (black line) observed upon mixing ( $t = 0$  s) an acetone solution of **1** (0.2 mM) with that of  $\text{Fc}^*$  (2.0 mM) and that observed at  $t = 1000$  s (red line) in the absence of  $\text{HClO}_4$  in  $\text{O}_2$ -saturated acetone at 193 K. (b) UV-Vis spectrum of the peroxy species,  $[(\text{tmpa})\text{Cu}^{\text{II}}(\text{O}_2)\text{Cu}^{\text{II}}(\text{tmpa})]^{2+}$  (black line) observed upon mixing of acetone solution of **1** (0.2 mM) with that of  $\text{Fc}^*$  (2.0 mM) and that observed after addition ( $t = 0$  s) of 0.4 mM  $\text{HClO}_4$  at  $t = 150$  s (red line) in  $\text{O}_2$ -saturated acetone at 193 K. (c) Time profiles of the absorption at 520 nm due to **2** in the presence or absence of  $\text{HClO}_4$ .
